# Supplementary material for: Structural effects influencing cis–trans isomerisation in methoxy and cyano substituted stilbene derivativesElectronic supplementary information (ESI) available: Cartesian coordinates for the calculated geometries of 1–3 and (E)- and (Z)-stilbene. See http://www.rsc.org/suppdata/p2/b2/b201623k/
Source: Royal Society of Chemistry journal article supplement (doi:10.1039/b201623k), 2002-05-17
Supplement: b201623k.pdf [file b201623k.pdf]

Supporting Information

**STRUCTURAL EFFECTS INFLUENCING THE *CIS-TRANS* ISOMERISATION IN  
METHOXY AND CYANO SUBSTITUTED STILBENE DERIVATIVES**

Christophe M.L. Vande Velde, Frank Blockhuys, Christian Van Alsenoy, Albert T.H. Lenstra  
and Herman J. Geise

Cartesian coordinates for the calculated geometries of *Z*- and *E*-1-cyano-1,2-bis(2-methoxyphenyl)ethene (CBMPE) **1** at the B3LYP/6-31G\* level.

|                 | <i>Z</i> |              |          | <i>E</i> |              |          |
|-----------------|----------|--------------|----------|----------|--------------|----------|
|                 | <i>x</i> | <i>y</i>     | <i>z</i> | <i>x</i> | <i>y</i>     | <i>z</i> |
| C(1A)           | -1.4975  | -0.1284      | -1.3609  | 1.5566   | 0.0935       | -0.5021  |
| C(2A)           | -1.3336  | -0.3546      | -2.7580  | 2.9595   | -0.1286      | -0.5056  |
| C(3A)           | -2.4050  | -0.1867      | -3.6393  | 3.8514   | 0.9479       | -0.5365  |
| C(4A)           | -3.6529  | 0.2051       | -3.1521  | 3.3620   | 2.2547       | -0.5715  |
| C(5A)           | -3.8395  | 0.4260       | -1.7888  | 1.9886   | 2.4954       | -0.5831  |
| C(6A)           | -2.7730  | 0.2574       | -0.9099  | 1.1025   | 1.4218       | -0.5500  |
| O(9A)           | -0.0851  | -0.7298      | -3.1619  | 3.3517   | -1.4345      | -0.4657  |
| C(10A)          | 0.1397   | -1.0008      | -4.5369  | 4.7376   | -1.7357      | -0.5341  |
| H(3A)           | -2.2753  | -0.3552      | -4.7018  | 4.9215   | 0.7773       | -0.5307  |
| H(4A)           | -4.4779  | 0.3337       | -3.8476  | 4.0642   | 3.0837       | -0.5950  |
| H(5A)           | -4.8113  | 0.7229       | -1.4065  | 1.6081   | 3.5115       | -0.6265  |
| H(6A)           | -2.9341  | 0.4176       | 0.1485   | 0.0350   | 1.6064       | -0.5821  |
| H(10A1)         | 1.1880   | -1.2944      | -4.6137  | 4.8051   | -2.8247      | -0.5234  |
| H(10A2)         | -0.4958  | -1.8208      | -4.8953  | 5.2790   | -1.3302      | 0.3302   |
| H(10A3)         | -0.0338  | -0.1105      | -5.1547  | 5.1878   | -1.3506      | -1.4580  |
| C(7)            | -0.1020  | 0.0144       | 0.7958   | -0.6174  | -1.1845      | -0.1080  |
| C(8)            | -0.3428  | -0.3480      | -0.4950  | 0.6663   | -1.0687      | -0.5374  |
| H(8)            | 0.4737   | -0.8755      | -0.9771  | 1.1070   | -1.9589      | -0.9771  |
| C(11)           | -1.0277  | 0.7867       | 1.5738   | -1.2785  | -2.4358      | -0.3647  |
| N(12)           | -1.7839  | 1.3836       | 2.2286   | -1.8111  | -3.4541      | -0.5538  |
| C(1B)           | 1.1421   | -0.4317      | 1.4852   | -1.3927  | -0.1872      | 0.6866   |
| C(2B)           | 1.9336   | 0.4702       | 2.2360   | -2.6537  | 0.2681       | 0.2406   |
| C(3B)           | 3.0925   | 0.0241       | 2.8793   | -3.3981  | 1.1580       | 1.0234   |
| C(4B)           | 3.4826   | -1.3128      | 2.7692   | -2.8895  | 1.6006       | 2.2464   |
| C(5B)           | 2.7232   | -2.2109      | 2.0239   | -1.6460  | 1.1626       | 2.6978   |
| C(6B)           | 1.5595   | -1.7648      | 1.3956   | -0.9108  | 0.2697       | 1.9175   |
| O(9B)           | 1.5015   | 1.7603       | 2.2538   | -3.0515  | -0.2023      | -0.9739  |
| C(10B)          | 2.1579   | 2.6956       | 3.0953   | -4.3672  | 0.0861       | -1.4228  |
| H(3B)           | 3.6999   | 0.7135       | 3.4542   | -4.3661  | 1.5097       | 0.6856   |
| H(4B)           | 4.3856   | -1.6452      | 3.2743   | -3.4770  | 2.2911       | 2.8456   |
| H(5B)           | 3.0194   | -3.2526      | 1.9444   | -1.2548  | 1.5010       | 3.6525   |
| H(6B)           | 0.9396   | -2.4647      | 0.8425   | 0.0522   | -0.0931      | 2.2642   |
| H(10B1)         | 2.1509   | 2.3667       | 4.1421   | -4.4828  | -0.4524      | -2.3646  |
| H(10B2)         | 1.5916   | 3.6235       | 3.0028   | -4.5062  | 1.1610       | -1.5990  |
| H(10B3)         | 3.1938   | 2.8675       | 2.7744   | -5.1203  | -0.2657      | -0.7065  |
| <i>E</i> (a.u.) |          | -861.9916574 |          |          | -861.9890714 |          |

Cartesian coordinates for the calculated geometries of *Z*- and *E*-1-cyano-2-(2-methoxyphenyl)-1-phenylethene (CPMPE) **2** at the B3LYP/6-31G\* level.

|                 | <i>Z</i> |              |          | <i>E</i> |              |          |
|-----------------|----------|--------------|----------|----------|--------------|----------|
|                 | <i>x</i> | <i>y</i>     | <i>z</i> | <i>x</i> | <i>y</i>     | <i>z</i> |
| C(1A)           | 0.9387   | 1.3063       | -0.2316  | 1.0886   | 0.1003       | -0.6510  |
| C(2A)           | 2.3510   | 1.1789       | -0.3741  | 2.4889   | -0.1261      | -0.5938  |
| C(3A)           | 3.1607   | 2.3108       | -0.4989  | 3.3854   | 0.9468       | -0.6266  |
| C(4A)           | 2.5862   | 3.5827       | -0.4869  | 2.9019   | 2.2523       | -0.7248  |
| C(5A)           | 1.2063   | 3.7327       | -0.3569  | 1.5304   | 2.4963       | -0.7979  |
| C(6A)           | 0.3989   | 2.6059       | -0.2343  | 0.6400   | 1.4268       | -0.7623  |
| O(9A)           | 2.8398   | -0.0946      | -0.3714  | 2.8705   | -1.4312      | -0.4961  |
| C(10A)          | 4.2343   | -0.2965      | -0.5475  | 4.2567   | -1.7423      | -0.5025  |
| H(3A)           | 4.2347   | 2.2109       | -0.6017  | 4.4540   | 0.7742       | -0.5743  |
| H(4A)           | 3.2266   | 4.4553       | -0.5829  | 3.6071   | 3.0786       | -0.7497  |
| H(5A)           | 0.7571   | 4.7211       | -0.3573  | 1.1562   | 3.5111       | -0.8922  |
| H(6A)           | -0.6730  | 2.7346       | -0.1516  | -0.4253  | 1.6118       | -0.8423  |
| H(10A1)         | 4.3813   | -1.3777      | -0.5325  | 4.3161   | -2.8308      | -0.4570  |
| H(10A2)         | 4.8109   | 0.1592       | 0.2671   | 4.7667   | -1.3144      | 0.3698   |
| H(10A3)         | 4.5809   | 0.1055       | -1.5080  | 4.7441   | -1.3875      | -1.4194  |
| C(7)            | -1.1325  | -0.1286      | 0.2704   | -1.0967  | -1.1774      | -0.2876  |
| C(8)            | 0.1514   | 0.0832       | -0.1362  | 0.1942   | -1.0581      | -0.7007  |
| H(8)            | 0.7002   | -0.8093      | -0.4158  | 0.6334   | -1.9422      | -1.1548  |
| C(11)           | -1.9490  | 0.9221       | 0.8058   | -1.7674  | -2.4042      | -0.6235  |
| N(12)           | -2.6483  | 1.7364       | 1.2588   | -2.3327  | -3.3851      | -0.8970  |
| C(1B)           | -1.7667  | -1.4752      | 0.2333   | -1.9051  | -0.2059      | 0.5044   |
| C(2B)           | -2.7967  | -1.8052      | 1.1310   | -1.3618  | 0.4373       | 1.6285   |
| C(3B)           | -3.3736  | -3.0736      | 1.1199   | -2.1346  | 1.3181       | 2.3818   |
| C(4B)           | -2.9406  | -4.0374      | 0.2081   | -3.4637  | 1.5672       | 2.0302   |
| C(5B)           | -1.9304  | -3.7162      | -0.7011  | -4.0175  | 0.9211       | 0.9241   |
| C(6B)           | -1.3547  | -2.4480      | -0.6947  | -3.2472  | 0.0356       | 0.1710   |
| H(2B)           | -3.1422  | -1.0637      | 1.8454   | -0.3338  | 0.2369       | 1.9128   |
| H(3B)           | -4.1639  | -3.3078      | 1.8280   | -1.7007  | 1.8032       | 3.2520   |
| H(4B)           | -3.3937  | -5.0248      | 0.1971   | -4.0656  | 2.2523       | 2.6210   |
| H(5B)           | -1.5995  | -4.4504      | -1.4309  | -5.0530  | 1.1009       | 0.6482   |
| H(6B)           | -0.5985  | -2.2026      | -1.4343  | -3.6869  | -0.4759      | -0.6808  |
| <i>E</i> (a.u.) |          | -747.4724845 |          |          | -747.4680214 |          |

Cartesian coordinates for the calculated geometries of *E*- and *Z*-1,2-bis-(2-methoxyphenyl)ethene (BMPE) **3** at the B3LYP/6-31G\* level.

|                 | <i>E</i>     |          |          | <i>Z</i>     |          |          |
|-----------------|--------------|----------|----------|--------------|----------|----------|
|                 | <i>x</i>     | <i>y</i> | <i>z</i> | <i>x</i>     | <i>y</i> | <i>z</i> |
| C(1A)           | -1.8954      | 0.4041   | -0.2276  | -1.5433      | 0.2068   | 0.5131   |
| C(2A)           | -3.0791      | -0.2912  | 0.1352   | -2.9248      | 0.3031   | 0.2114   |
| C(3A)           | -4.3211      | 0.3500   | 0.1157   | -3.8121      | -0.7129  | 0.5813   |
| C(4A)           | -4.4095      | 1.6913   | -0.2635  | -3.3381      | -1.8364  | 1.2622   |
| C(5A)           | -3.2627      | 2.3930   | -0.6308  | -1.9861      | -1.9457  | 1.5824   |
| C(6A)           | -2.0287      | 1.7468   | -0.6164  | -1.1077      | -0.9279  | 1.2128   |
| O(9A)           | -2.9114      | -1.5985  | 0.5027   | -3.3047      | 1.4345   | -0.4574  |
| C(10A)          | -4.0534      | -2.3579  | 0.8589   | -4.6788      | 1.6202   | -0.7504  |
| H(3A)           | -5.2213      | -0.1842  | 0.3971   | -4.8667      | -0.6386  | 0.3421   |
| H(4A)           | -5.3809      | 2.1785   | -0.2756  | -4.0356      | -2.6206  | 1.5448   |
| H(5A)           | -3.3283      | 3.4324   | -0.9394  | -1.6170      | -2.8106  | 2.1260   |
| H(6A)           | -1.1414      | 2.2867   | -0.9331  | -0.0582      | -0.9989  | 1.4787   |
| H(10A1)         | -3.6845      | -3.3569  | 1.0993   | -4.7488      | 2.5856   | -1.2554  |
| H(10A2)         | -4.7701      | -2.4259  | 0.0296   | -5.2887      | 1.6427   | 0.1626   |
| H(10A3)         | -4.5593      | -1.9383  | 1.7385   | -5.0594      | 0.8354   | -1.4175  |
| C(7)            | 0.6076       | 0.2942   | -0.2022  | 0.6514       | 1.3299   | -0.1760  |
| C(8)            | -0.6076      | -0.2942  | -0.2022  | -0.6514      | 1.3299   | 0.1760   |
| H(7)            | 0.6747       | 1.3768   | -0.1529  | 1.1260       | 2.3063   | -0.2474  |
| H(8)            | -0.6747      | -1.3768  | -0.1529  | -1.1260      | 2.3063   | 0.2474   |
| C(1B)           | 1.8954       | -0.4041  | -0.2276  | 1.5433       | 0.2068   | -0.5131  |
| C(2B)           | 3.0791       | 0.2912   | 0.1352   | 2.9248       | 0.3031   | -0.2114  |
| C(3B)           | 4.3211       | -0.3500  | 0.1157   | 3.8121       | -0.7129  | -0.5813  |
| C(4B)           | 4.4095       | -1.6913  | -0.2635  | 3.3381       | -1.8364  | -1.2622  |
| C(5B)           | 3.2627       | -2.3930  | -0.6308  | 1.9861       | -1.9457  | -1.5824  |
| C(6B)           | 2.0287       | -1.7468  | -0.6164  | 1.1077       | -0.9279  | -1.2128  |
| O(9B)           | 2.9114       | 1.5985   | 0.5027   | 3.3047       | 1.4345   | 0.4574   |
| C(10B)          | 4.0534       | 2.3579   | 0.8589   | 4.6788       | 1.6202   | 0.7504   |
| H(3B)           | 5.2213       | 0.1842   | 0.3971   | 4.8667       | -0.6386  | -0.3421  |
| H(4B)           | 5.3809       | -2.1785  | -0.2756  | 4.0356       | -2.6206  | -1.5448  |
| H(5B)           | 3.3283       | -3.4324  | -0.9394  | 1.6170       | -2.8106  | -2.1260  |
| H(6B)           | 1.1414       | -2.2867  | -0.9331  | 0.0582       | -0.9989  | -1.4787  |
| H(10B1)         | 3.6845       | 3.3569   | 1.0993   | 4.7488       | 2.5856   | 1.2554   |
| H(10B2)         | 4.7701       | 2.4259   | 0.0296   | 5.2887       | 1.6427   | -0.1626  |
| H(10B3)         | 4.5593       | 1.9383   | 1.7385   | 5.0594       | 0.8354   | 1.4175   |
| <i>E</i> (a.u.) | -769.7531249 |          |          | -769.7460814 |          |          |

Cartesian coordinates for the calculated geometries  
of *E*- and *Z*-stilbene at the B3LYP/6-31G\* level.

|                 | <i>E</i> |              |          | <i>Z</i> |              |          |
|-----------------|----------|--------------|----------|----------|--------------|----------|
|                 | <i>x</i> | <i>y</i>     | <i>z</i> | <i>x</i> | <i>y</i>     | <i>z</i> |
| C(1A)           | -1.9421  | -0.1642      | -0.0043  | -1.6380  | 0.7182       | 0.1629   |
| C(2A)           | -2.8430  | -1.2435      | 0.0655   | -2.9212  | 0.8701       | -0.3930  |
| C(3A)           | -4.2213  | -1.0393      | 0.0725   | -3.8843  | -0.1302      | -0.2707  |
| C(4A)           | -4.7367  | 0.2556       | 0.0077   | -3.5917  | -1.3003      | 0.4317   |
| C(5A)           | -3.8575  | 1.3408       | -0.0654  | -2.3302  | -1.4560      | 1.0126   |
| C(6A)           | -2.4816  | 1.1358       | -0.0729  | -1.3653  | -0.4600      | 0.8825   |
| H(2A)           | -2.4489  | -2.2561      | 0.1167   | -3.1587  | 1.7839       | -0.9331  |
| H(3A)           | -4.8923  | -1.8925      | 0.1283   | -4.8652  | 0.0077       | -0.7180  |
| H(4A)           | -5.8107  | 0.4203       | 0.0121   | -4.3422  | -2.0793      | 0.5355   |
| H(5A)           | -4.2485  | 2.3536       | -0.1199  | -2.0992  | -2.3551      | 1.5781   |
| H(6A)           | -1.8201  | 1.9948       | -0.1371  | -0.3950  | -0.5853      | 1.3513   |
| C(7)            | 0.5037   | 0.4481       | -0.0038  | 0.6738   | 1.8276       | -0.0381  |
| C(8)            | -0.5037  | -0.4481      | -0.0038  | -0.6738  | 1.8276       | 0.0381   |
| H(7)            | 0.2605   | 1.5097       | 0.0042   | 1.1433   | 2.8115       | -0.0228  |
| H(8)            | -0.2605  | -1.5097      | 0.0042   | -1.1433  | 2.8115       | 0.0228   |
| C(1B)           | 1.9421   | 0.1642       | -0.0043  | 1.6380   | 0.7182       | -0.1629  |
| C(2B)           | 2.8430   | 1.2435       | 0.0655   | 2.9212   | 0.8701       | 0.3930   |
| C(3B)           | 4.2213   | 1.0393       | 0.0725   | 3.8843   | -0.1302      | 0.2707   |
| C(4B)           | 4.7367   | -0.2556      | 0.0077   | 3.5917   | -1.3003      | -0.4317  |
| C(5B)           | 3.8575   | -1.3408      | -0.0654  | 2.3302   | -1.4560      | -1.0126  |
| C(6B)           | 2.4816   | -1.1358      | -0.0729  | 1.3653   | -0.4600      | -0.8825  |
| H(2B)           | 2.4489   | 2.2561       | 0.1167   | 3.1587   | 1.7839       | 0.9331   |
| H(3B)           | 4.8923   | 1.8925       | 0.1283   | 4.8652   | 0.0077       | 0.7180   |
| H(4B)           | 5.8107   | -0.4203      | 0.0121   | 4.3422   | -2.0793      | -0.5355  |
| H(5B)           | 4.2485   | -2.3536      | -0.1199  | 2.0992   | -2.3551      | -1.5781  |
| H(6B)           | 1.8201   | -1.9948      | -0.1371  | 0.3950   | -0.5853      | -1.3513  |
| <i>E</i> (a.u.) |          | -540.7099729 |          |          | -540.7019205 |          |

Experimental ( $\delta$ ) and calculated (HF and DFT)  $^1\text{H}$  chemical shifts (ppm), with reference to TMS, for Z-CBMPE **1** and Z-CPMPE **2** (see text for details).

|                | d               |                     |      |    | J             |  | HF   |                 | DFT                 |                 |                     |
|----------------|-----------------|---------------------|------|----|---------------|--|------|-----------------|---------------------|-----------------|---------------------|
| <b>Z-CPMPE</b> | H(6A)           | 8.14                | dd   | 1H | 7.8, 1.5      |  | 9.39 | H(6A)           | 8.67                | H(6A)           |                     |
|                | H(8)            | 7.94                | s    | 1H |               |  | 8.74 | H(8)            | 8.13                | H(8)            |                     |
|                | H(2B),H(6B)     | 7.68                | m    | 2H |               |  | 8.07 | H(2B),H(6B)     | 7.62                | H(2B),H(6B)     |                     |
|                | H(4A)           | 7.33-7.44           | m    | 4H |               |  | 7.9  | H(4A)           | 7.38                | H(4A)           |                     |
|                | H(3B),H(5B)     | 7.33-7.44           | m    |    |               |  | 7.71 | H(3B),H(5B)     | 7.34                | H(3B),H(5B)     |                     |
|                | H(4B)           | 7.33-7.44           | m    |    |               |  | 7.62 | H(4B)           | 7.3                 | H(4B)           |                     |
|                | H(5A)           | 7.03                | t    | 1H | 7.8           |  | 7.34 | H(5A)           | 7.05                | H(5A)           |                     |
|                | H(3A)           | 6.92                | dd   | 1H | 8.4, 0.9      |  | 6.87 | H(3A)           | 6.47                | H(3A)           |                     |
|                | CH <sub>3</sub> | 3.87                | s    | 3H |               |  | 3.89 | CH <sub>3</sub> | 3.81                | CH <sub>3</sub> |                     |
| <b>Z-CBMPE</b> | H(6A)           | 8.18                | dd   | 1H | 7.8, 1.4      |  | 9.50 | H(6A)           | 8.82                | H(6A)           |                     |
|                | H(8)            | 7.82                | s    | 1H |               |  | 8.33 | H(8)            | 7.62                | H(8)            |                     |
|                | H(6B)           | 7.43                | dd   | 1H | 7.5, 1.7      |  | 7.87 | H(4A)           | 7.37                | H(4A)           |                     |
|                | H(4A)           | 7.38                | ddd  | 1H | 8.3, 7.3, 1.5 |  | 7.79 | H(6B)           | 7.33                | H(4B)           |                     |
|                | H(4B)           | 7.34                | ddd  | 1H | 8.2, 7.5, 1.7 |  | 7.79 | H(4B)           | 7.25                | H(6B)           |                     |
|                | H(5A)           | 7.06                | t    | 1H | 7.3           |  | 7.33 | H(5A)           | 7.09                | H(5A)           |                     |
|                | H(5B)           | 7.01                | dt   | 1H | 7.5, 1.1      |  | 7.20 | H(5B)           | 6.97                | H(5B)           |                     |
|                | H(3B)           | 6.96                | dd   | 1H | 8.3, 0.8      |  | 6.93 | H(3B)           | 6.54                | H(3B)           |                     |
|                | H(3A)           | 6.92                | dd   | 1H | 8.3, 0.7      |  | 6.84 | H(3A)           | 6.45                | H(3A)           |                     |
|                |                 | CH <sub>3</sub> (B) | 3.92 | s  | 3H            |  |      | 3.90            | CH <sub>3</sub> (B) | 3.88            | CH <sub>3</sub> (B) |
|                |                 | CH <sub>3</sub> (A) | 3.86 | s  | 3H            |  |      | 3.83            | CH <sub>3</sub> (A) | 3.82            | CH <sub>3</sub> (A) |
